# Supplementary material
Source: Springer Nature journal article supplement (https://www.springermedizin.de/resource/supplementary/12885_2013_4448_MOESM5_ESM.pdf/9466300)

**A***MTUS1* vs. grade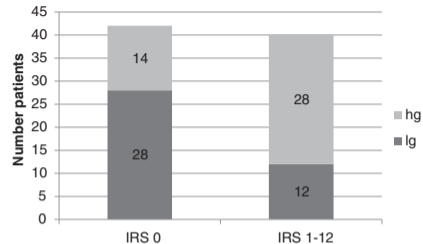**B***MTUS1* vs. stage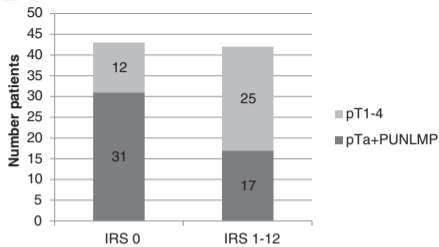**C***MTUS1* vs. CK20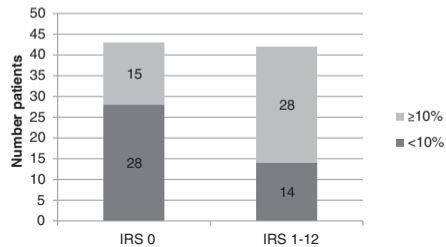**D***MTUS1* vs. Ki67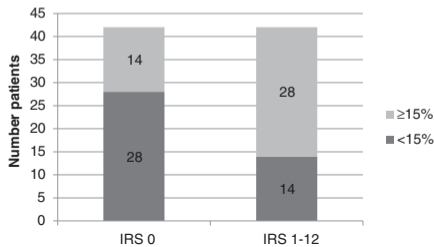

Supplement: MOESM5 [file 9466300]
